# Supplementary material for: The Interplay of Iron Minerals and Microflora to Accelerate Cr (VI) Reduction
Source: MDPI journal article supplement (doi:10.3390/min12040460), 2022-04-09
Supplement: s1 [file s1]

# The interplay of iron minerals and microflora to accelerate Cr (VI) reduction

Jinglei Zhu, Pan Lei, Mengfei Liu, Peng He, Yanzong Chen , Min Gan<sup>1</sup> and Jianyu Zhu<sup>1</sup>

## 1. Electrochemical analysis

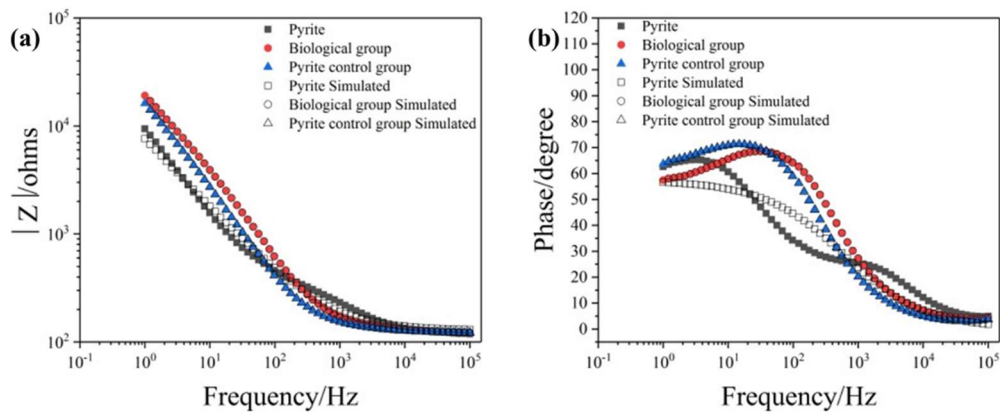

**Figure S1.** Bode plots of pyrite before and after treatment with or without chromium solution.

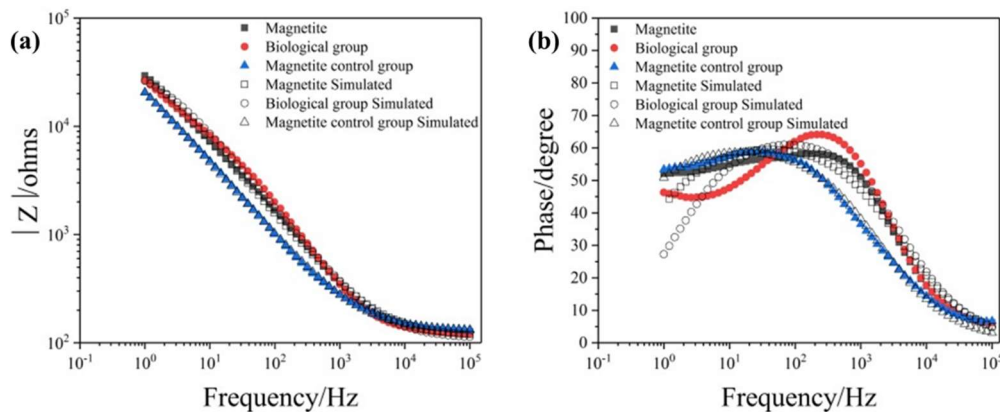

**Figure S2.** Bode plots of magnetite before and after treatment with or without chromium solution.

## 2. Changes in microbial community structure

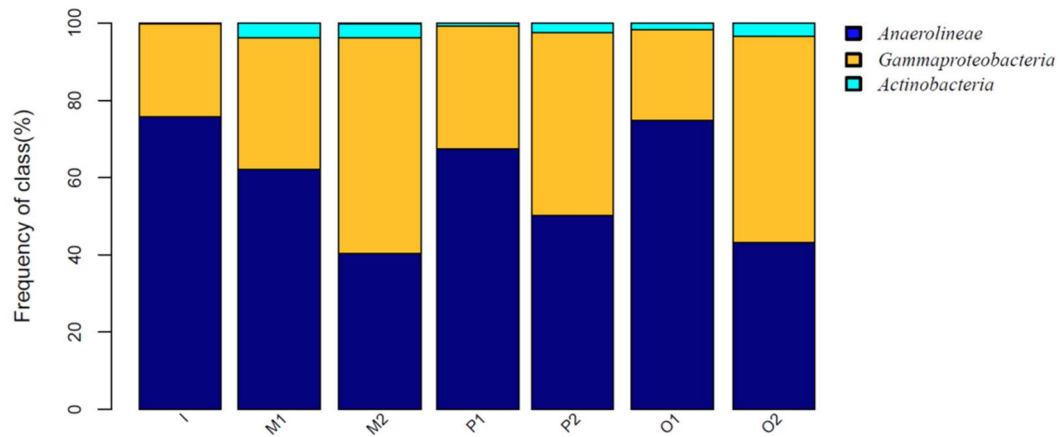

**Figure S3.** Relative abundance of phyla in different Cr(VI) reduction systems (“M” means magnetite, “P” means pyrite, “O” means iron-free, “I” means initial bacteria, “1” means 32 h, “2” means 77 h).

At the phylum level, the initial microbial community (I) was mainly composed of *Anaerolineae* and *Proteobacteria*. In the process of Cr (VI) reduction, the microbial community structure changed with the change in environmental factors. According to the literature, extracellular respiratory bacteria mainly exist as *thick-walled bacteria* and *proteobacteria*. As shown in Fig. S 3, the addition of iron ore significantly changed the composition of the original microbial community. As the experiment progressed, the relative content of *Proteobacteria* and *Actinobacteria* increased, while the relative content of *Anaerolineae* decreased. This may be because Cr (VI) can play a directional screening role so that the content of dominant bacteria gradually increases, resulting in changes in the microbial community structure in the system.
